# Supplementary material for: A genomic timescale of prokaryote evolution: insights into the origin of methanogenesis, phototrophy, and the colonization of land
Source: PubMed Central journal article supplement (PMC533871; doi:10.1186/1471-2148-4-44), 2004-11-09

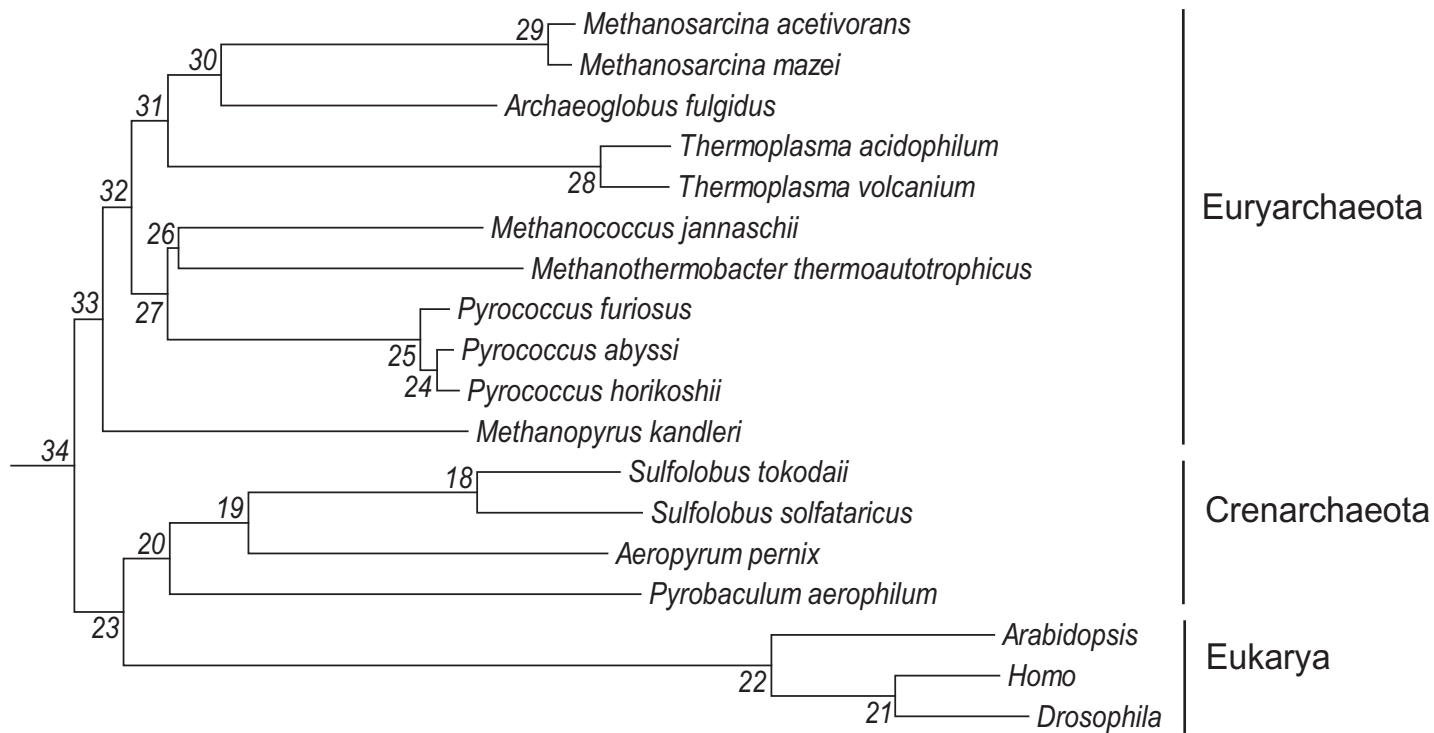

Supplement: 1471-2148-4-44-S3.pdf [file 1471-2148-4-44-S3.pdf]
